# Supplementary material for: PD-1 Controls Follicular T Helper Cell Positioning and Function
Source: PubMed Central journal article supplement (PMC6104813; doi:10.1016/j.immuni.2018.06.012), 2018-08-21
Supplement: mmc1.pdf [file mmc1.pdf]

**Immunity, Volume 49**

**Supplemental Information**

**PD-1 Controls Follicular T Helper Cell**

**Positioning and Function**

**Jingwen Shi, Shiyue Hou, Qian Fang, Xin Liu, Xiaolong Liu, and Hai Qi**

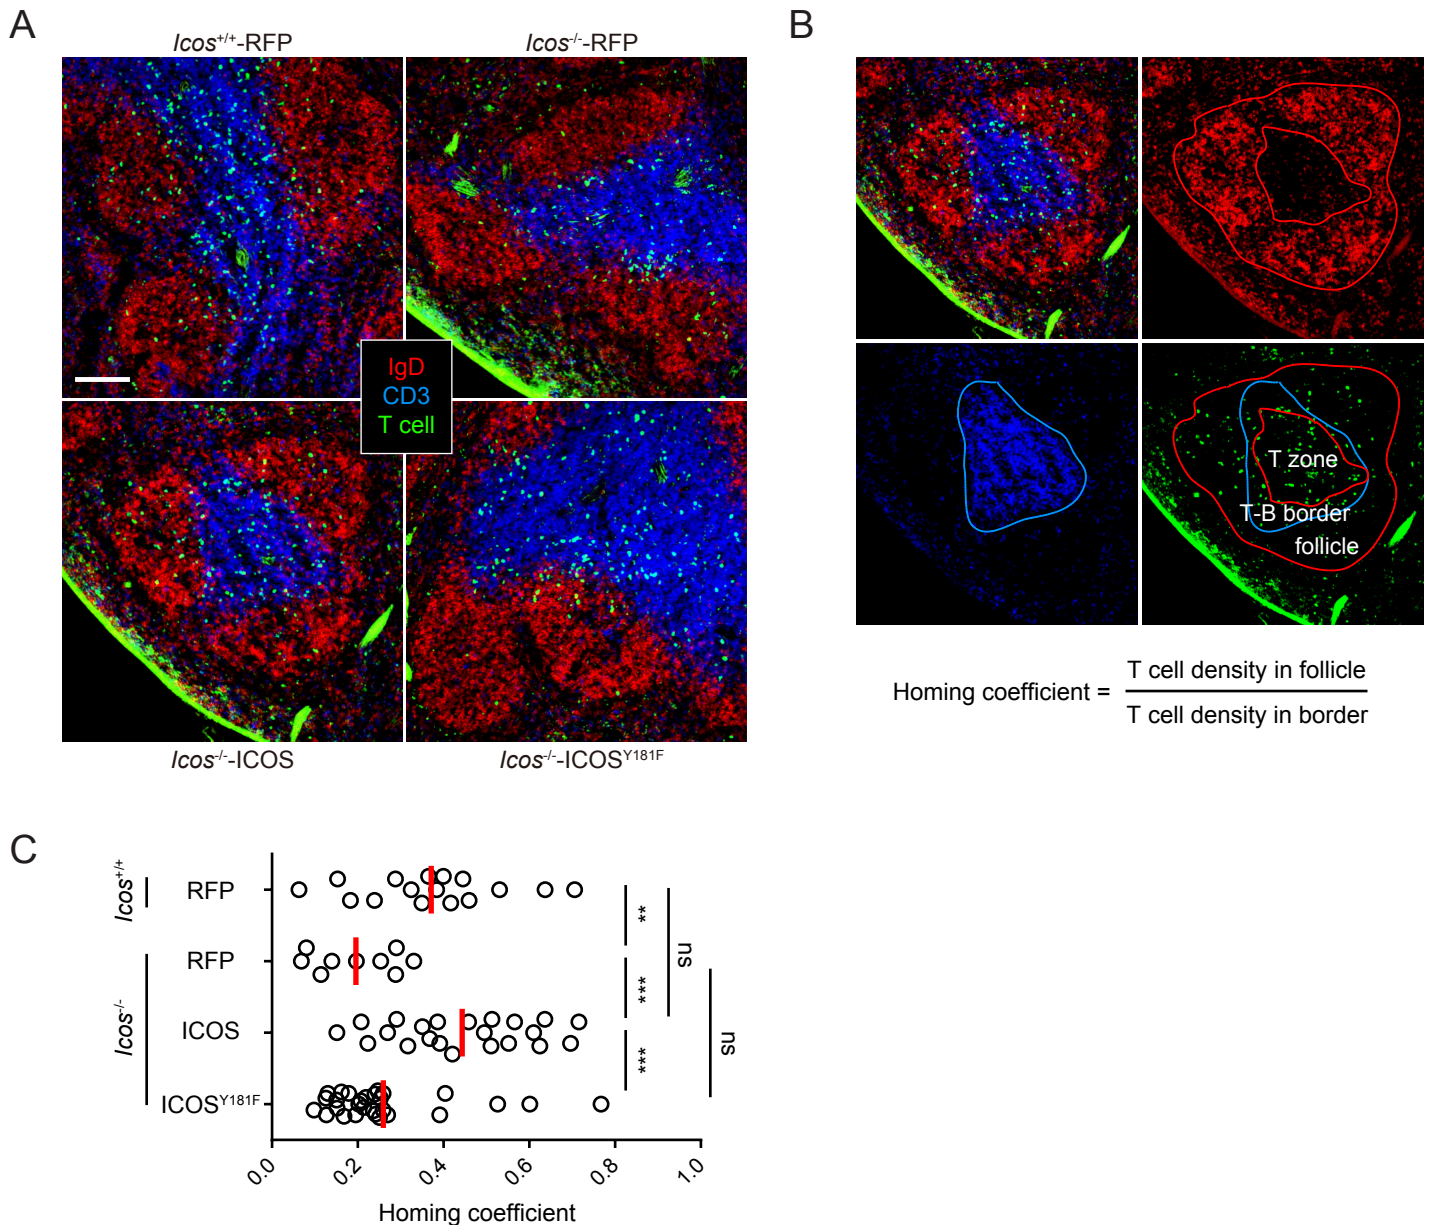

**Figure S1. ICOS-driven follicular recruitment requires its PI3K-activating Y181-based motif. Related to Figure 1.**

T cells of indicated genotypes were retrovirally co-transduced with a vector co-expressing CXCR5 and GFP and another vector expressing empty RFP, wildtype ICOS or mutant ICOS<sup>Y181F</sup>. These cells were transferred into B6 mice (2-3×10<sup>6</sup> sorted GFP<sup>+</sup>RFP<sup>+</sup> cells per mouse).

(A) GFP<sup>+</sup> T-cell distribution patterns in the spleen 24h after transfer. Scale bar, 100 μm.

(B) Derivation of the follicular homing coefficient parameter. The outer boundary of the T-cell zone is defined as endogenous CD3<sup>+</sup> cells farthest into the follicle (blue line), while the inner boundary of the follicle is defined as endogenous IgD<sup>+</sup> cells farthest into the T-cell zone (inner red line). The T–B border area is thus the region in-between endogenous CD3<sup>+</sup> cells farthest into the follicle and endogenous IgD<sup>+</sup> cells farthest into the T-cell zone.

(C) Homing coefficients of the four groups in (A). Each symbol represents one section. Data represent four independent experiments, each involving at least 3 recipients.

\*\*  $P < 0.01$ ; \*\*\*  $P < 0.0001$ ; ns, not significant.

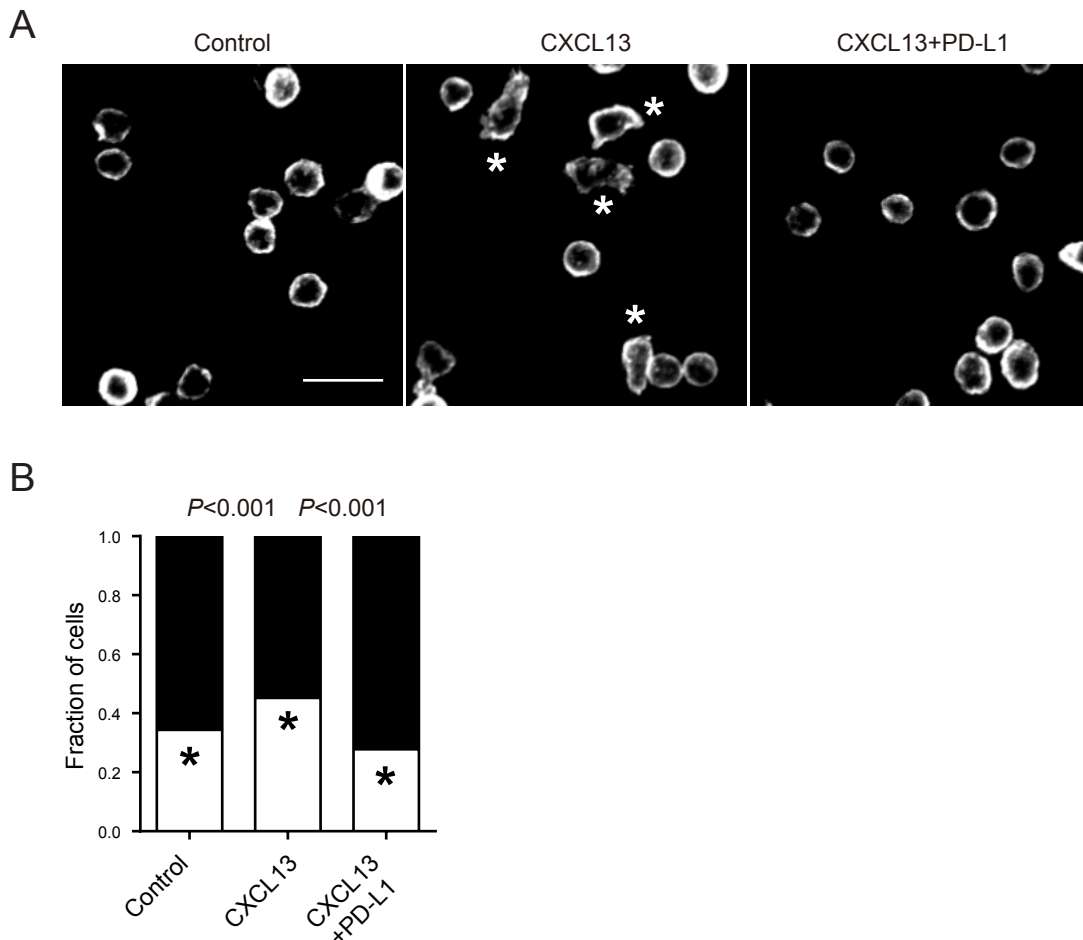

**Figure S2. PD-1 inhibits CXCL13-stimulated T-cell polarization. Related to Figure 1.**

(A) Typical morphologies revealed by Phalloidin staining of F-actin in co-transduced CXCR5<sup>+</sup>PD-1<sup>+</sup> T cells that were not stimulated (Control), CXCL13-stimulated (CXCL13), or CXCL13-stimulated in the presence of PD-L1-Fc (CXCL13+PD-L1). Asterisks mark polarized cells. Scale bar, 20  $\mu$ m.

(B) Fractions of polarized (\*) and non-polarized cells among the 3 groups, with a total of 1629 (Control), 1375 (CXCL13), and 1815 (CXCL13+PD-L1) cells enumerated in 4 independent experiments. *P* values from Fisher's exact tests.

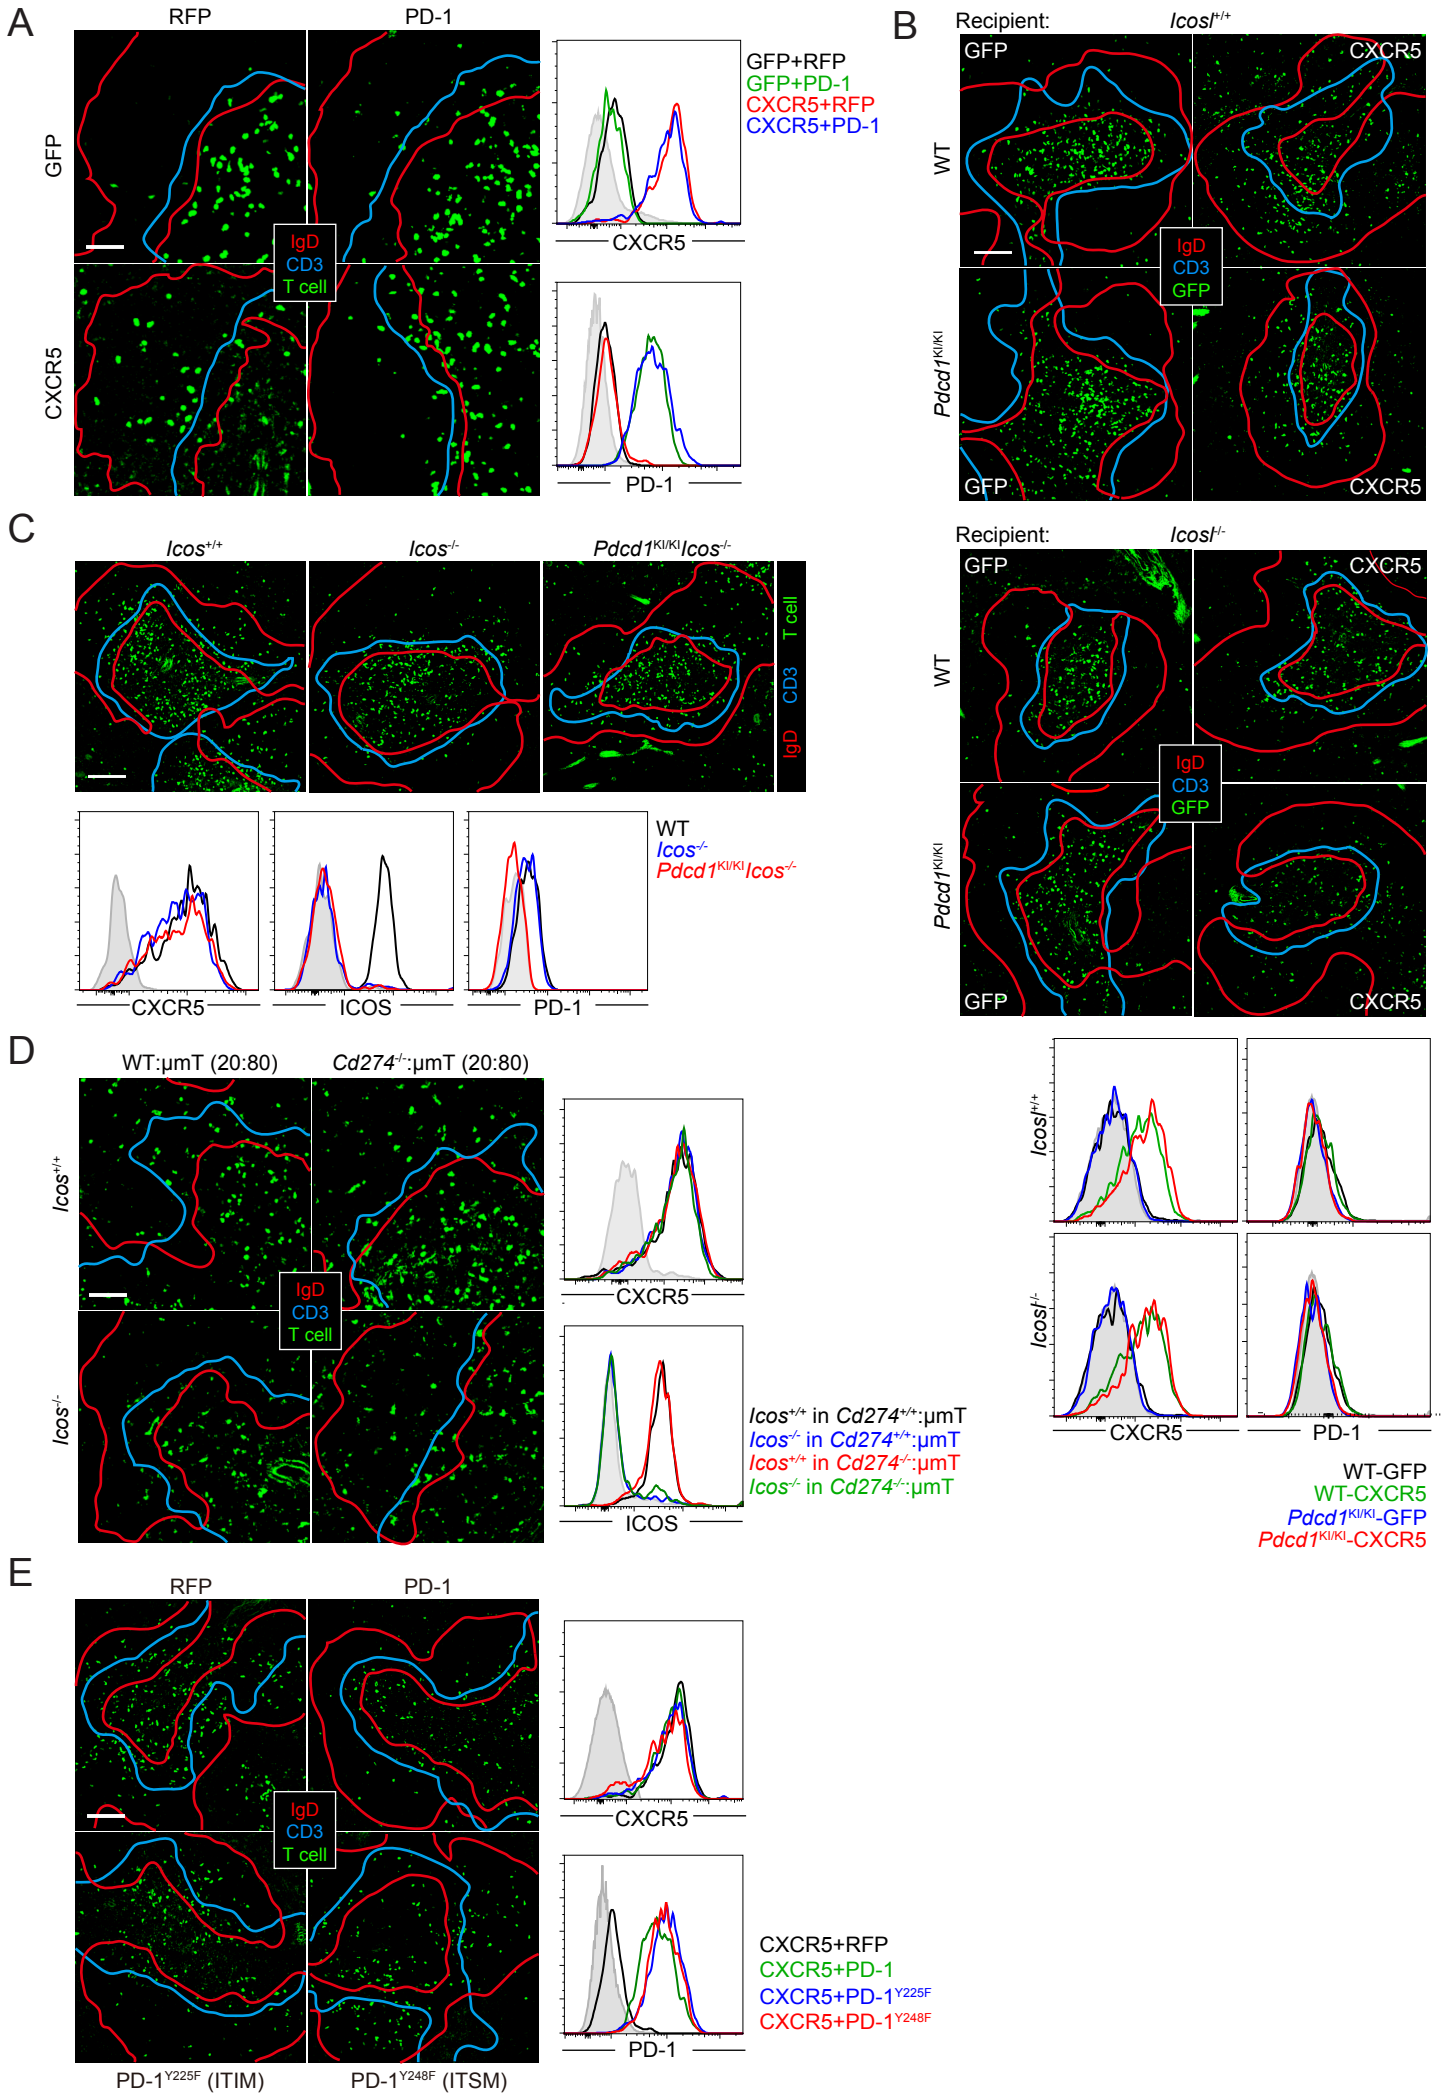

**Figure S3. Definition of T-zone and follicular borders for quantitative homing analyses and surface levels of CXCR5, PD-1 and ICOS on transduced cells. Related to Figure 1.**

The boundaries of T-cell zones, follicles and T-B border areas are defined as in Figure S1B. Outlines of T-cell zones, follicles, and T-B border areas for representative images from all the homing assays shown in Figures 1D (A), 2A (B), 2C (C), 3A (D) and 4A (E), respectively. Surface expression of CXCR5 and PD-1, together with ICOS in certain experiments, are also shown for the transferred cells in corresponding experiments.

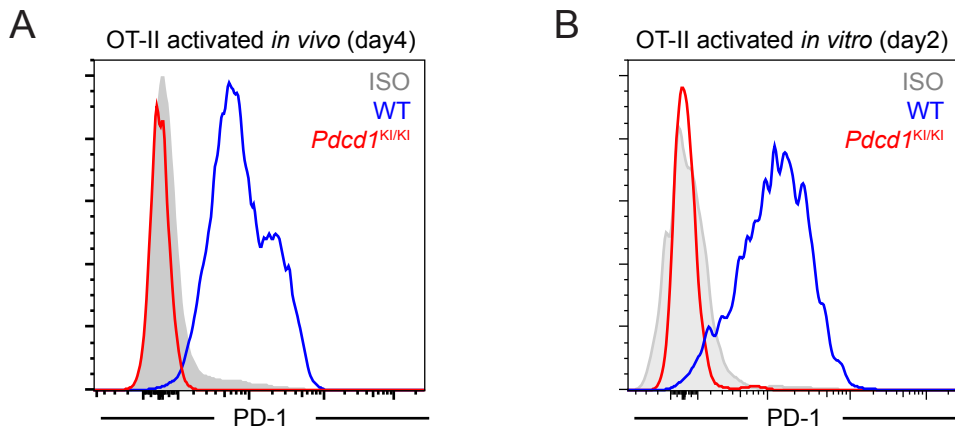

**Figure S4. Disabled PD-1 upregulation in *Pdccl1<sup>KI/KI</sup>* T cells. Related to Figure 2.**

Surface PD-1 expression by wildtype or *Pdccl1<sup>KI/KI</sup>* OT-II T cells in adoptive B6 hosts 4 d after ovalbumin immunization (A), or 2 d after in vitro activation with plate-bound anti-CD3 and anti-CD28 (B). Grey histograms, isotype control. Data represent three independent experiments.

A

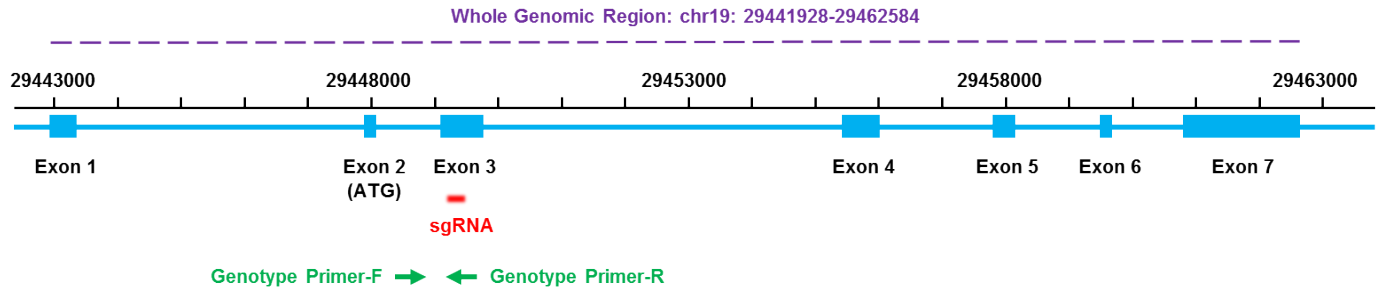

Exon 3:

wt allele ... CGTTTACTATCACGGCTCCAAAGGACTTGTACGTGGTGGAGTATGGCAGC  
 ko allele CGTTTACTATCACGGCTCCAAAGGACTTGTACGTGGTGGAGTATGG - - - -

wt allele AACGTCACGATGGAGTGCAGATTCCCTGTAGAACGGGAGCTGGACCTGC  
 ko allele - - - - - AGTGCAGATTCCCTGTAGAACGGGAGCTGGACCTGC

wt allele TTGCGTTAGTGGTGTACTGGGAAAAGGAAGATGAGCAAGTGATTTCAGTTT  
 ko allele TTGCGTTAGTGGTGTACTGGGAAAAGGAAGATGAGCAAGTGATTTCAGTTT

wt allele GTGGCAGGAGAGGAGGACCTTAAGCCTCAGCACAGCAACTTCAGGGGG ...  
 ko allele GTGGCAGGAGAGGAGGACCTTAAGCCTCAGCACAGCAACTTCAGGGGG

B

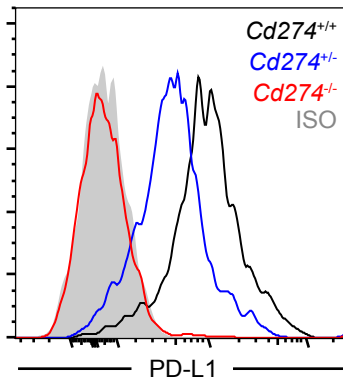

C

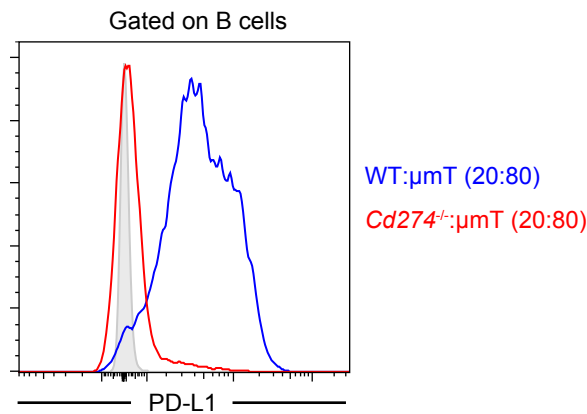

### Figure S5. Genetic ablation of *Cd274*. Related to Figure 3.

(A) Schematic presentation of CRISPR/Cas9-mediated targeting and genotyping strategy for genomic deletion of *Cd274* (top) and sequence alignment of the wildtype allele and the knockout allele used in this study (bottom). Nucleotide coordinates according to NCBI and exon distribution of the *Cd274* locus are shown. The exon 3 was targeted by an sgRNA (red), and 2 green arrows mark the positions of the genotyping primers (see Methods for primer sequences).

(B) PD-L1 expression by naïve B cells from mice of the indicated genotypes.

(C) PD-L1 expression by B cells from mixed BM chimeras of indicated types, as used in Figure 3. Grey histogram, isotype control.

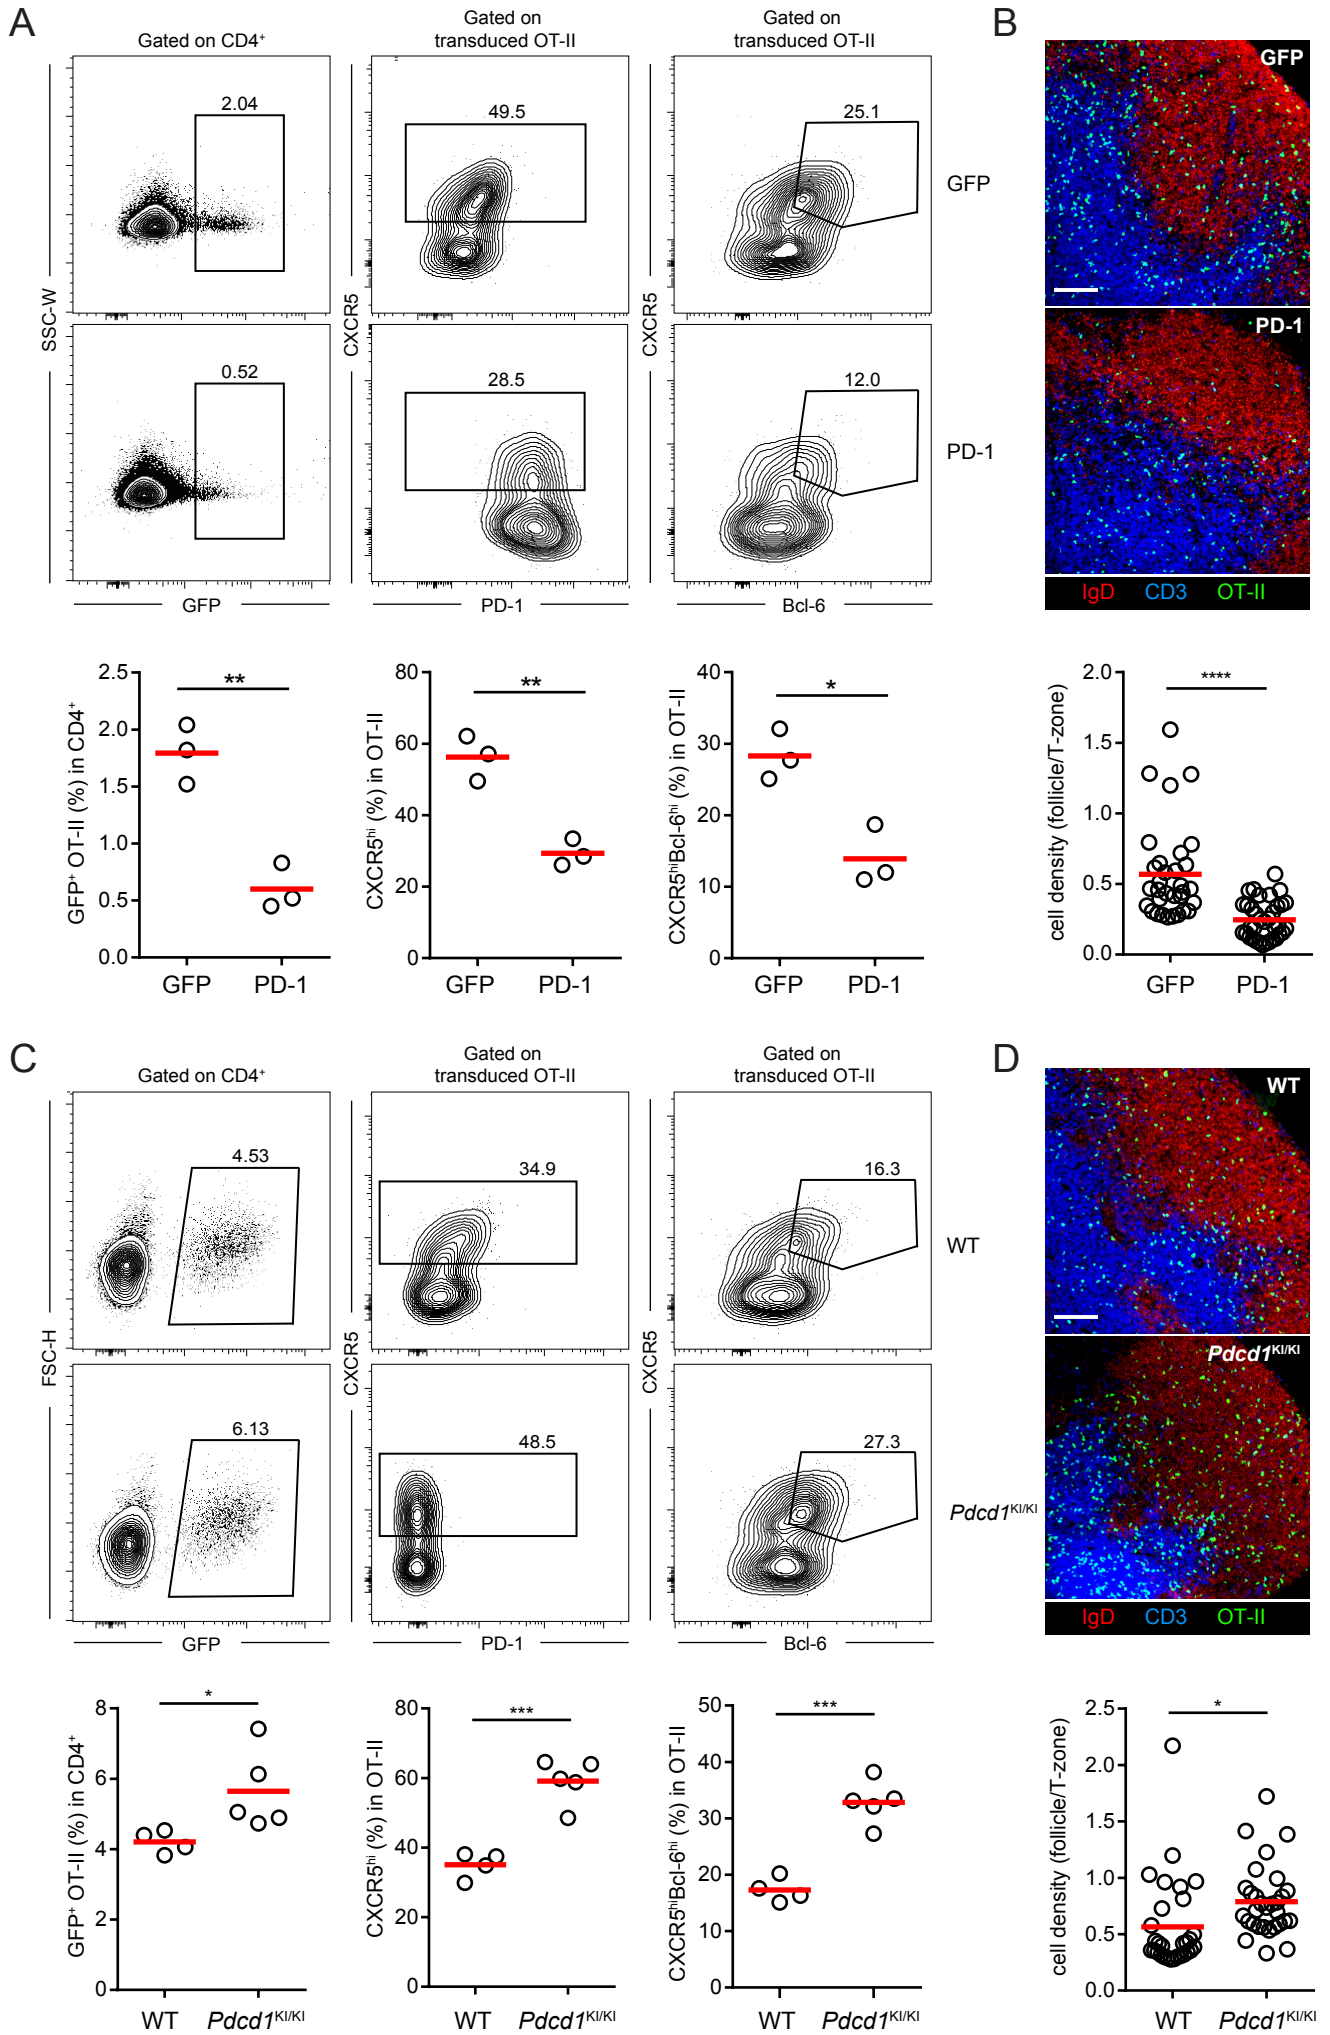



**Figure S6. PD-1 inhibits Tfh development. Related to Figure 5.**

(A) OT-II T cells transduced with a vector expressing PD-1 or control GFP were transferred into B6 mice ( $5 \times 10^5$  sorted GFP<sup>+</sup> cells per mouse), and then these mice were subcutaneously immunized with OVA protein. Expansion of GFP<sup>+</sup> OT-II cells, measured by their frequencies in total CD4 T cells, and Tfh frequencies, as measured by CXCR5<sup>hi</sup> or CXCR5<sup>hi</sup>Bcl-6<sup>hi</sup> fractions in OT-II cells were assayed in the draining lymph node 4 d post immunization.

(B) OT-II distribution patterns and density ratios between the follicle and the T-zone in draining lymph nodes in (A).

(C) GFP-transduced wildtype or *Pdcd1*<sup>KI/KI</sup> OT-II T cells were transferred into B6 mice ( $5 \times 10^5$  sorted GFP<sup>+</sup> cells per mouse), and the recipients were subcutaneously immunized with OVA protein. Expansion of GFP<sup>+</sup> OT-II cells, measured by their frequencies in total CD4 T cells, and Tfh frequencies, as measured by CXCR5<sup>hi</sup> or CXCR5<sup>hi</sup>Bcl-6<sup>hi</sup> fractions in OT-II cells were assayed in the draining lymph node 4 d post immunization.

(D) OT-II distribution patterns and density ratios between the follicle and the T-zone in draining lymph nodes in (C).

Scale bar, 100  $\mu$ m. Flow cytometry data are from one of 3 independent experiments with similar results (3-4 recipient mice per condition per experiment). Data on cell density ratios are pooled from 3 independent experiments. \*  $P < 0.05$ ; \*\*  $P < 0.01$ ; \*\*\*\*  $P < 0.0001$ .

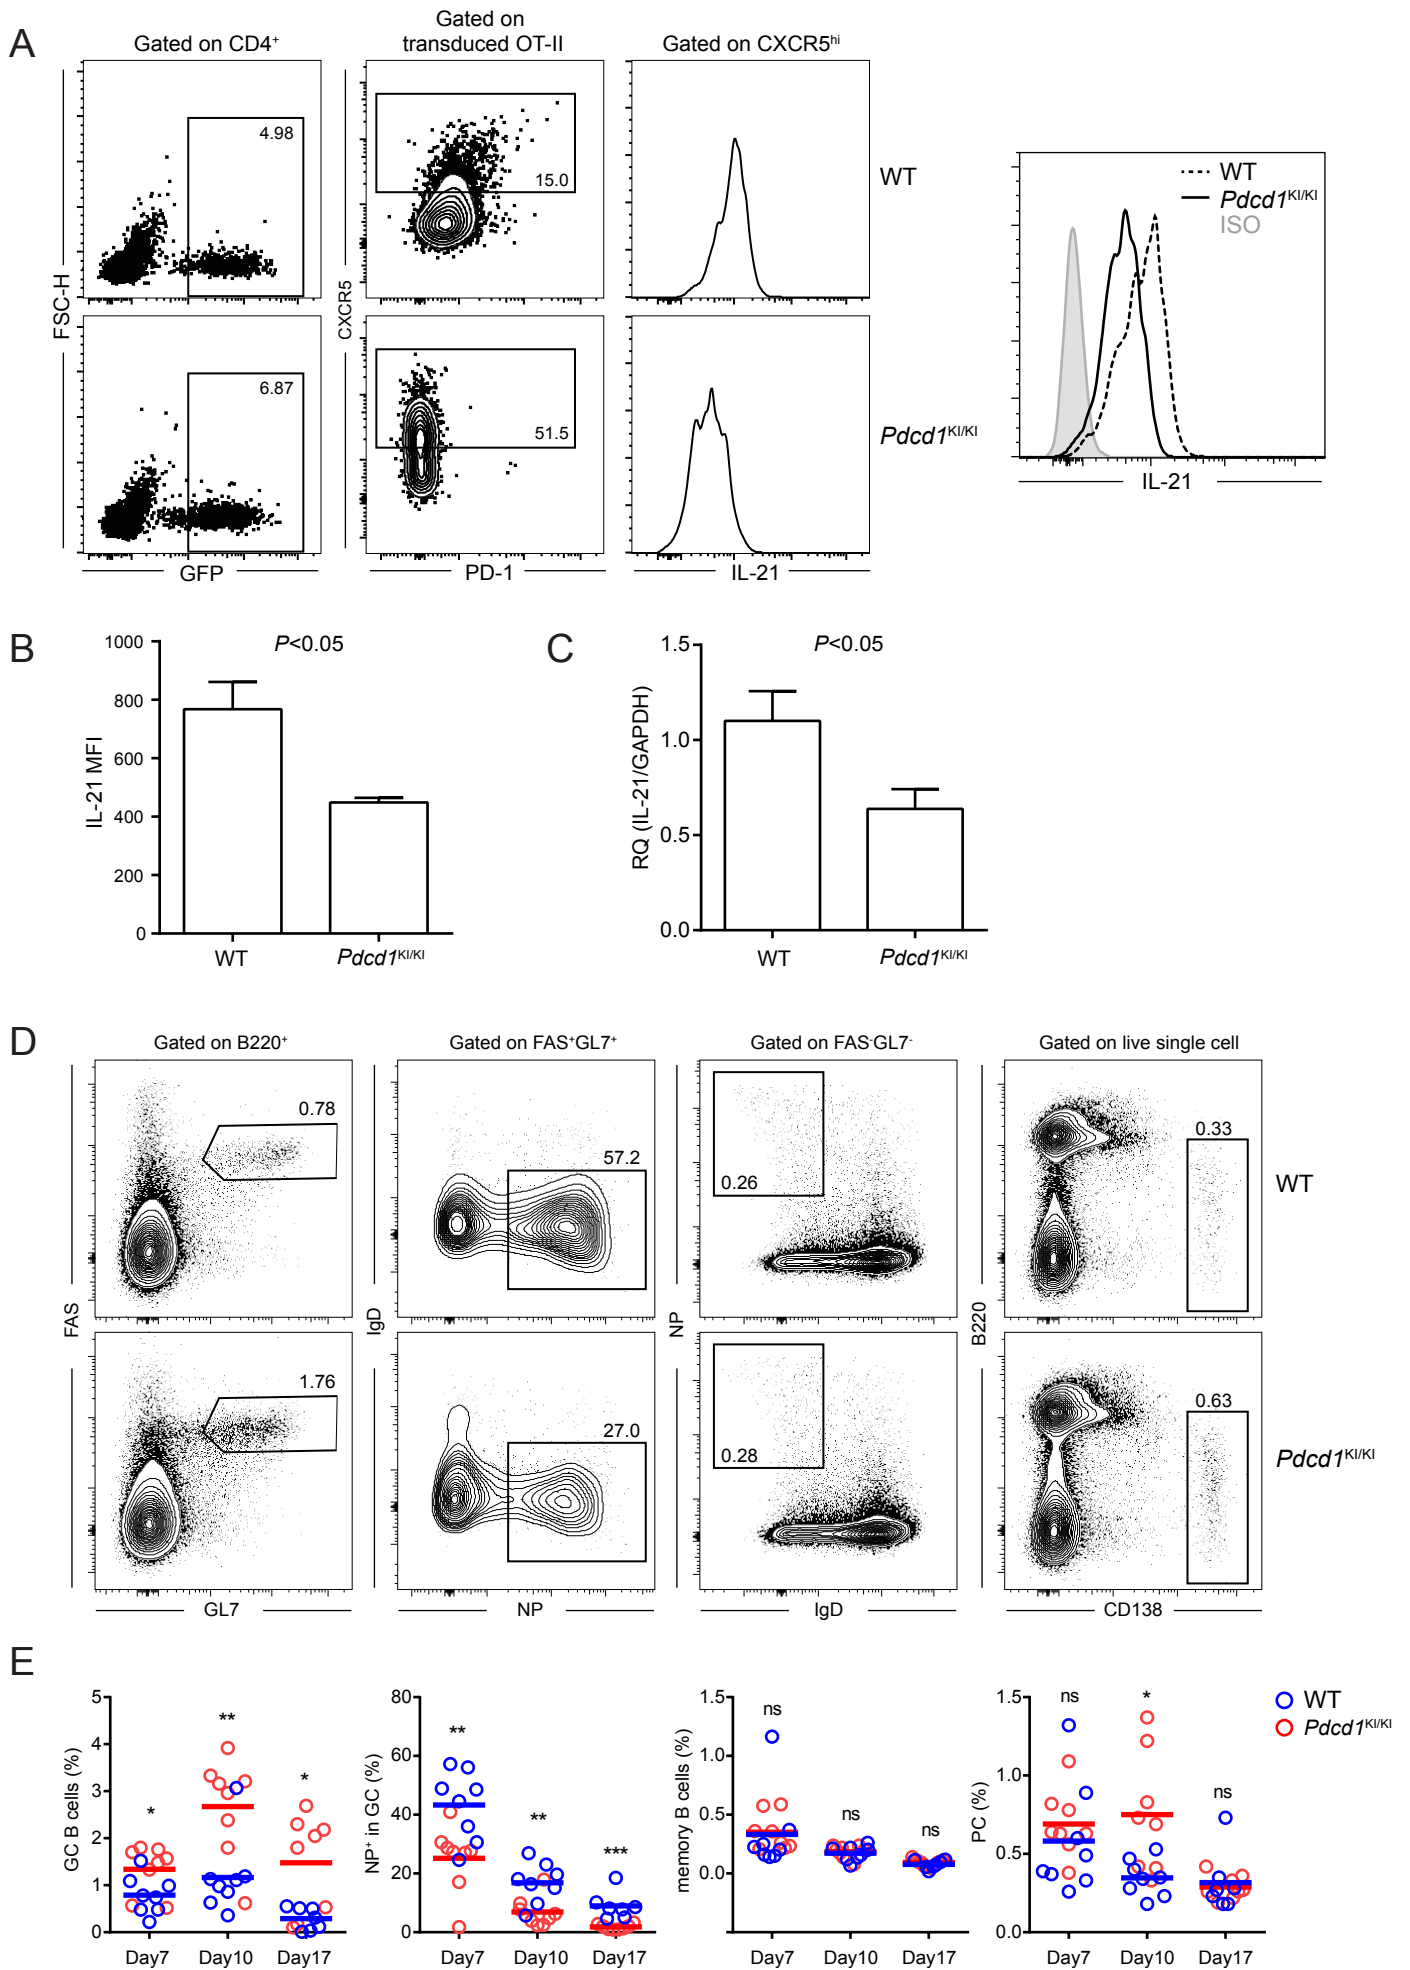

**Figure S7. *Pdcd1*<sup>KI/KI</sup> Tfh cells are impaired in IL-21 production and causes abnormal GC responses. Related to Figure 7.**

(A) GFP-transduced wildtype or *Pdcd1*<sup>KI/KI</sup> OT-II T cells were transferred into B6 mice ( $5 \times 10^5$  sorted GFP<sup>+</sup> cells per mouse) together with  $5 \times 10^5$  dsRed-expressing MD4 B cells, and the recipients were subcutaneously immunized with HEL-OVA. Strategies for gating GFP<sup>+</sup>CXCR5<sup>hi</sup> OT-II Tfh cells and intracellular IL-21 staining of Tfh cells of the two genotypes are shown.

(B) Mean fluorescence intensity (MFI, mean $\pm$ sem) of IL-21 staining in Tfh cells of indicated genotypes (n=3). One of two experiments with similar results is shown.

(C) Relative IL-21 expression in wildtype or *Pdcd1*<sup>KI/KI</sup> OT-II Tfh cells as detected by quantitative RT-PCR. Data are mean  $\pm$  s.e.m of 5 independent experiments.

(D) *Sap*<sup>-/-</sup> mice received  $5 \times 10^5$  wildtype or *Pdcd1*<sup>KI/KI</sup> OT-II T cells and were intraperitoneally immunized with NP-OVA. From left to right, gating of GC B cells, NP-binding cells in GCs, memory B cells, and plasma cells, as assayed 7 d post immunization.

(E) Frequencies of GC B cells in total B220<sup>+</sup> cells, NP-specific cells in total GC B cells, NP-specific memory B cells in non-GC B cells, and plasma cells in total splenocytes 7, 10, and 17 d after immunization. Each symbol denotes one mouse. Data are pooled from 3 independent experiments.

\*  $P < 0.05$ , \*\*  $P < 0.01$ , \*\*\*  $P < 0.001$ .
